# Supplementary material for: Divergent Small Tim Homologues Are Associated with TbTim17 and Critical for the Biogenesis of TbTim17 Protein Complexes in Trypanosoma brucei
Source: PubMed Central journal article supplement (PMC6010621; doi:10.1128/msphere.00204-18), 2018-06-20

**TbTim9 Models**

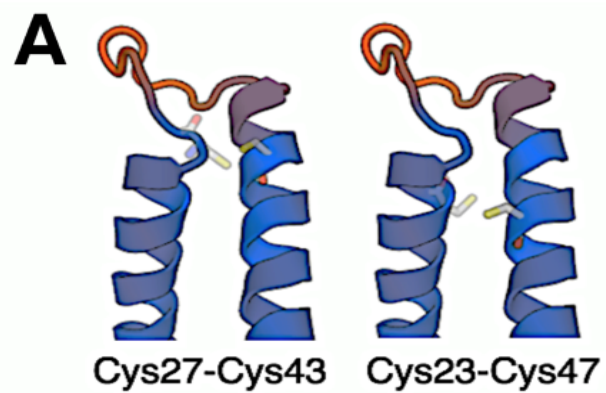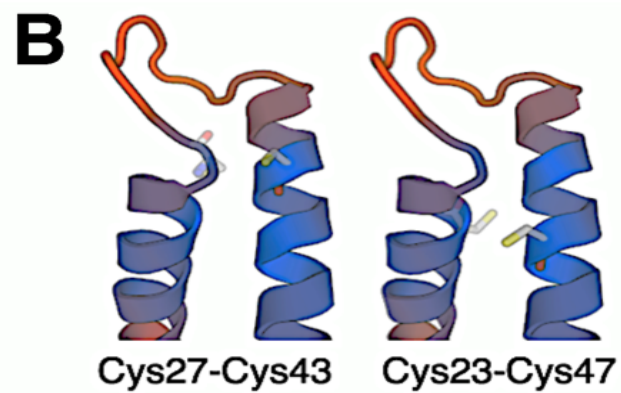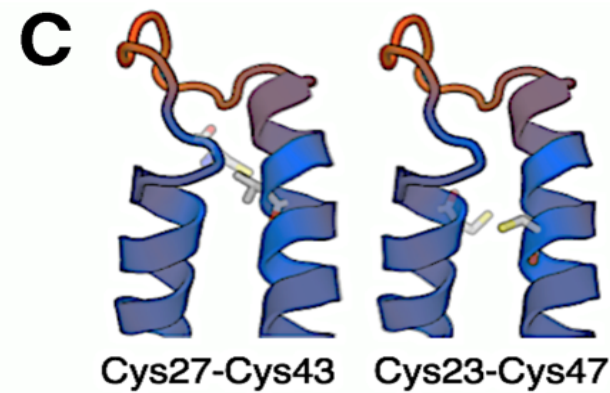

**TbTim10 Models**

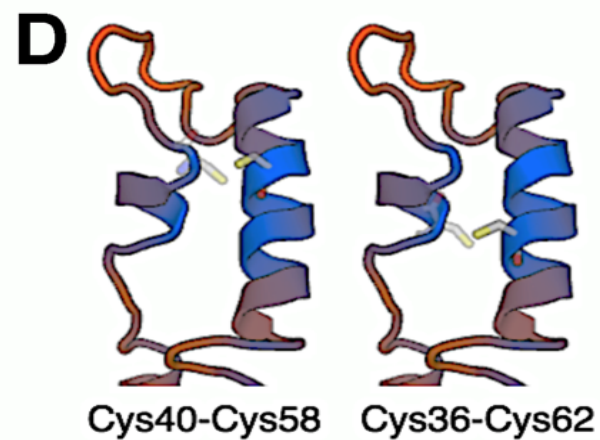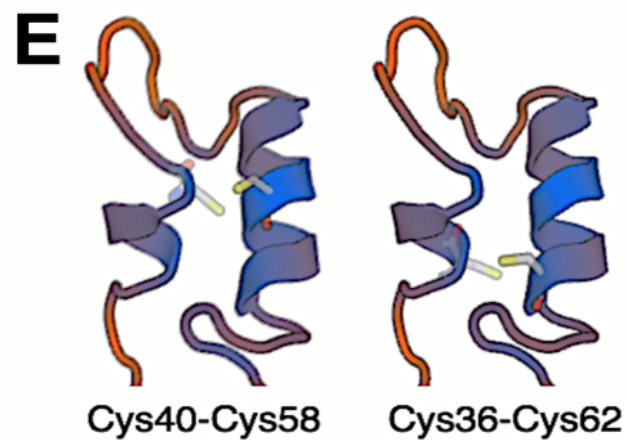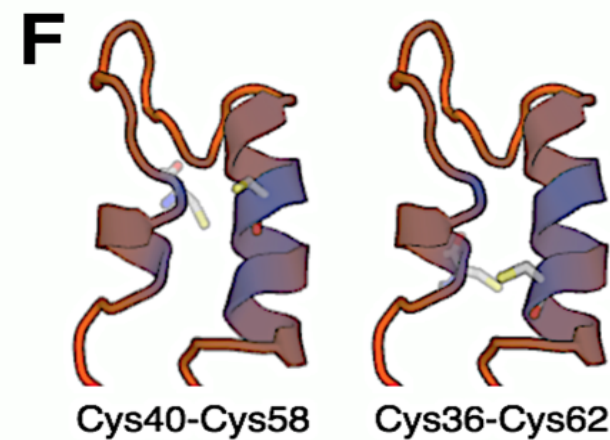

**TbTim8/13 Models**

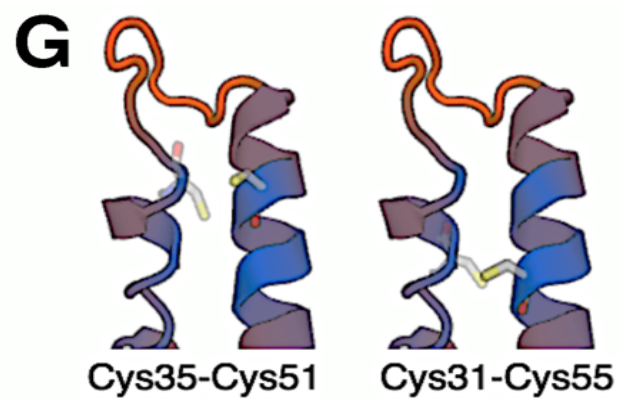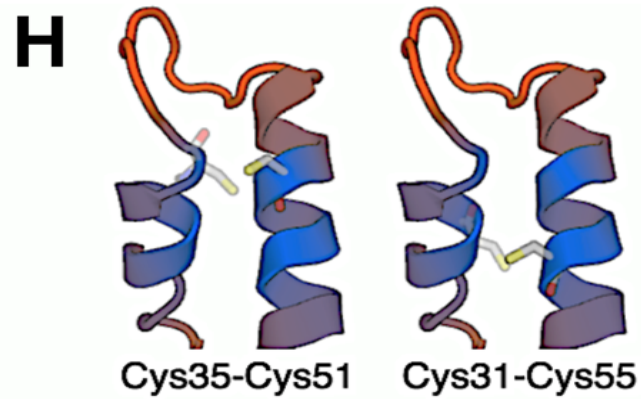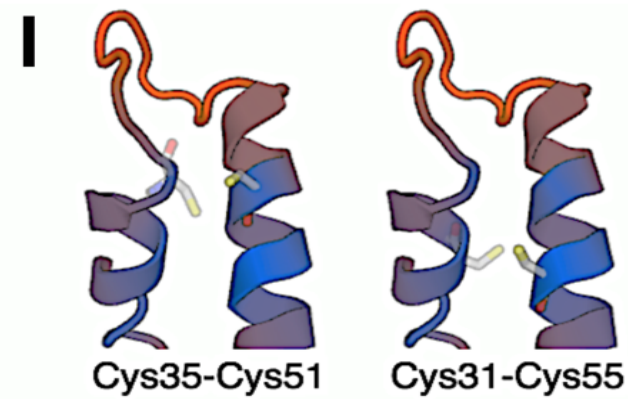

Supplement: sph003182572sf1.pdf [file sph003182572sf1.pdf]
