# Supplementary material for: Divergent Small Tim Homologues Are Associated with TbTim17 and Critical for the Biogenesis of TbTim17 Protein Complexes in Trypanosoma brucei
Source: PubMed Central journal article supplement (PMC6010621; doi:10.1128/msphere.00204-18), 2018-06-20

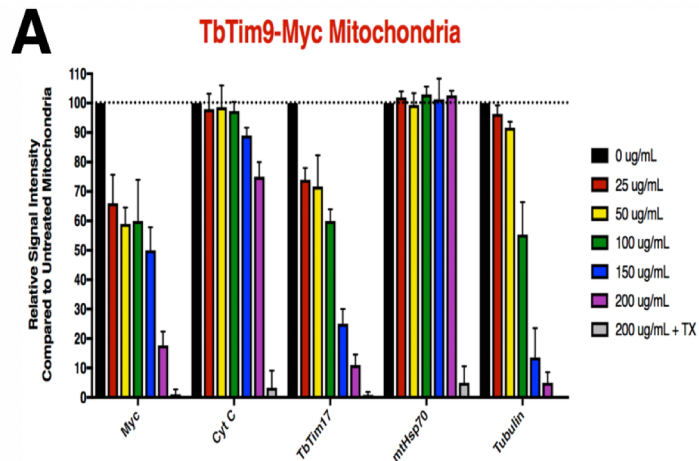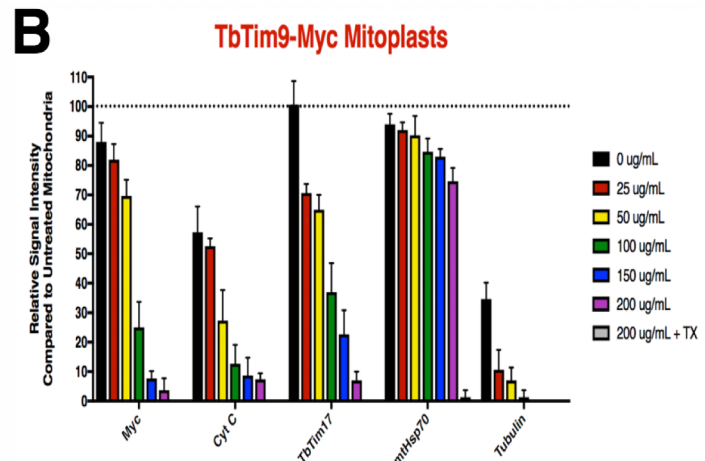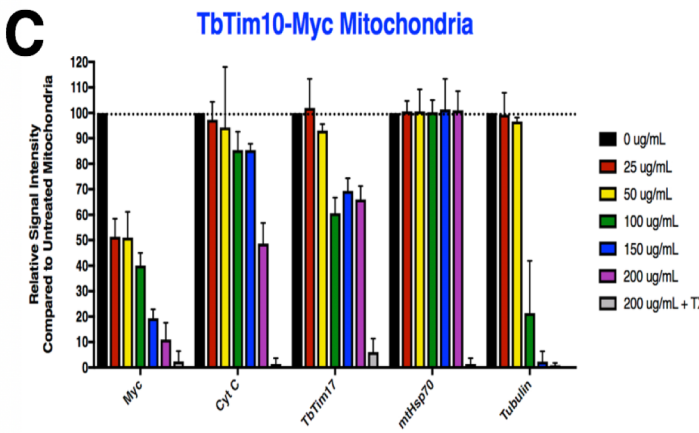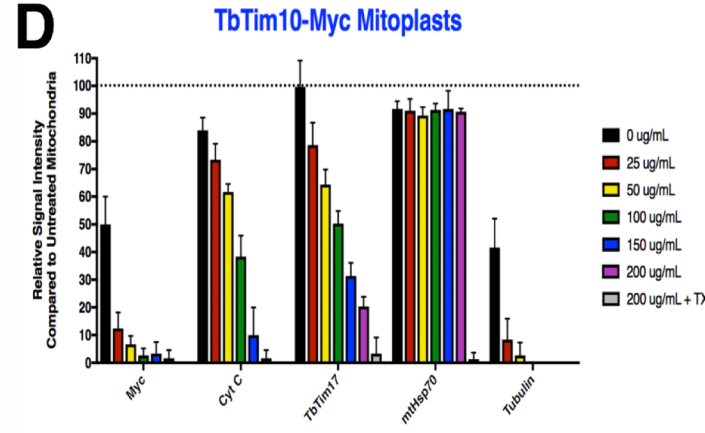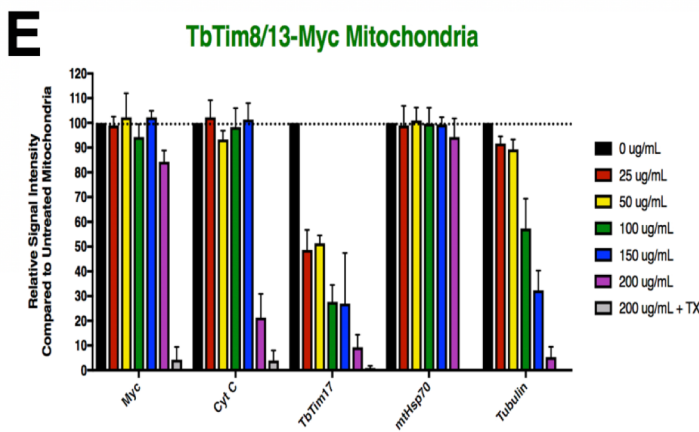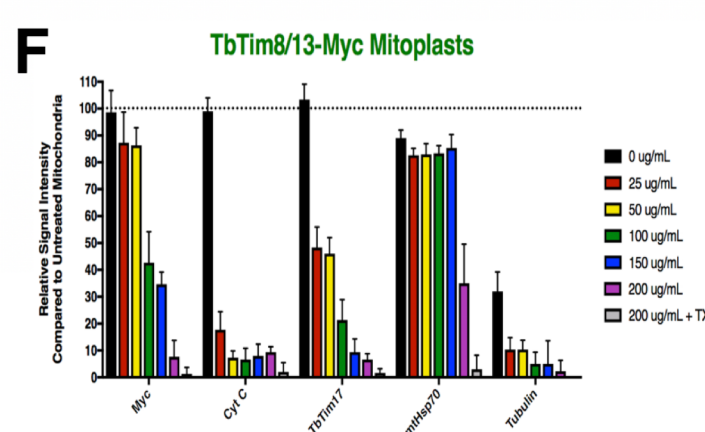

Supplement: sph003182572sf3.pdf [file sph003182572sf3.pdf]
