# Supplementary material for: Divergent Small Tim Homologues Are Associated with TbTim17 and Critical for the Biogenesis of TbTim17 Protein Complexes in Trypanosoma brucei
Source: PubMed Central journal article supplement (PMC6010621; doi:10.1128/msphere.00204-18), 2018-06-20

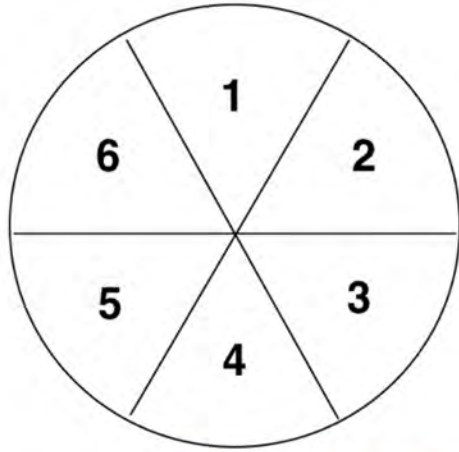

1. SV40-T-AD + p53-BD
2. Empty-AD + Empty-BD (clone 1)
3. Empty-AD alone
4. Empty-BD alone
5. Empty-AD + Empty-BD (clone 2)
6. No DNA

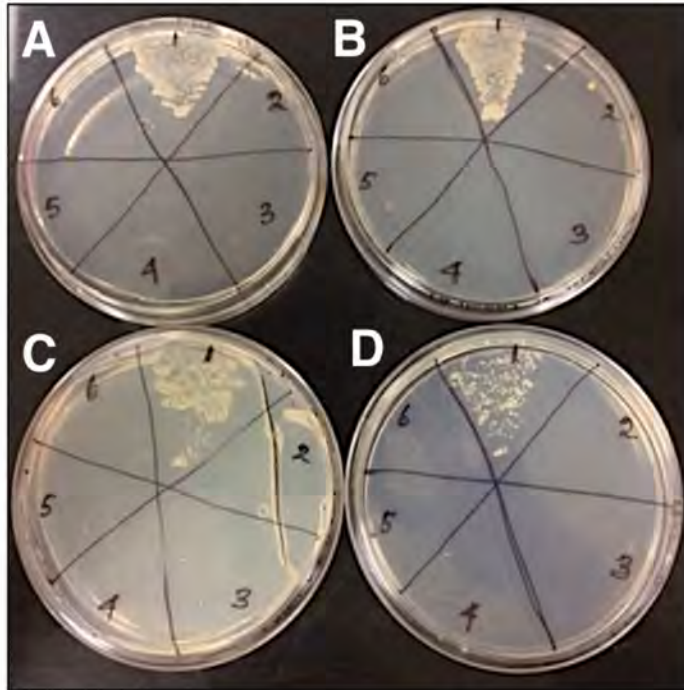

- (A) SD -Leu/ -Trp/ -His  
 (B) SD -Leu/ -Trp/ -His + 2.0 mM AT  
 (C) SD -Leu/ -Trp/ -His + 3.5 mM AT  
 (D) SD -Leu/ -Trp/ -His + 5.0 mM AT

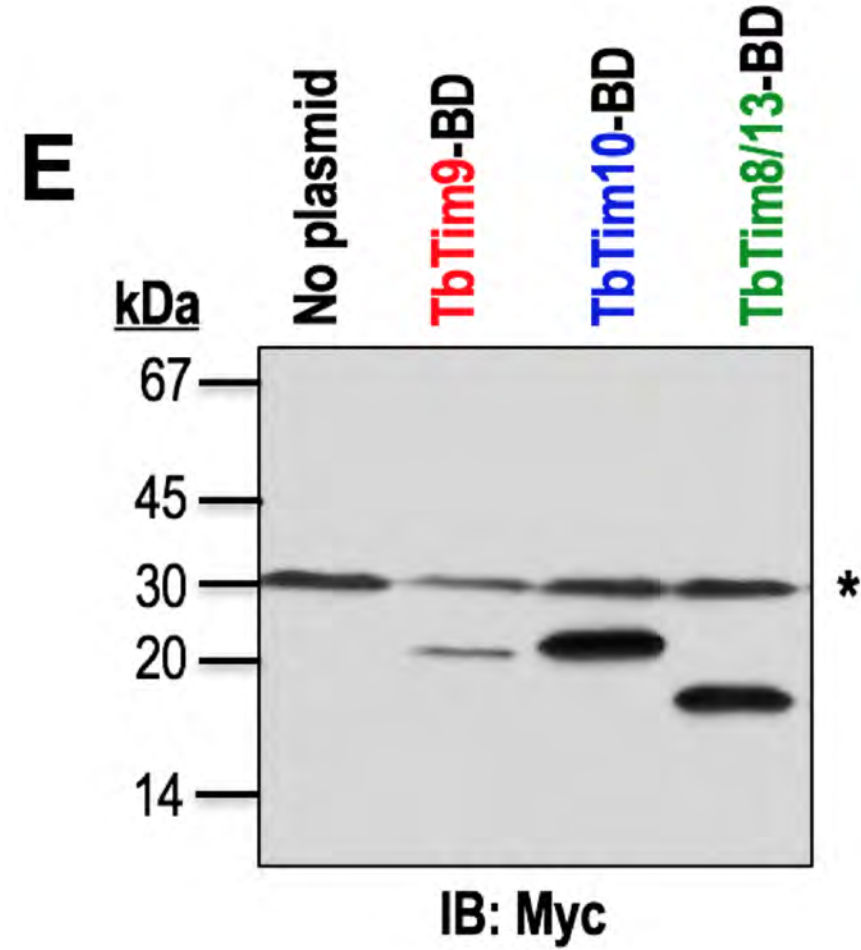

Supplement: sph003182572sf4.pdf [file sph003182572sf4.pdf]
