# Supplementary material for: Divergent Small Tim Homologues Are Associated with TbTim17 and Critical for the Biogenesis of TbTim17 Protein Complexes in Trypanosoma brucei
Source: PubMed Central journal article supplement (PMC6010621; doi:10.1128/msphere.00204-18), 2018-06-20
Supplement: sph003182572st1.pdf [file sph003182572st1.pdf]

| Paired Small Tim Comparisons | Similarity (%) | Identity (%) |
|------------------------------|----------------|--------------|
| TbTim9 vs. TbTim10           | 28.8           | 15.3         |
| TbTim9 vs. TbTim8/13         | 31.9           | 22.3         |
| TbTim10 vs. TbTim8/13        | 35.2           | 20.0         |
| TbTim9 vs. ScTim9            | 38.1           | 21.6         |
| TbTim9 vs. AtTim9            | 24.8           | 16.8         |
| TbTim9 vs. HsTim9            | 37.9           | 20.0         |
| <b>AtTim9 vs. HsTim9</b>     | <b>45.2</b>    | <b>32.7</b>  |
| <b>ScTim9 vs. HsTim9</b>     | <b>49.0</b>    | <b>34.4</b>  |
| TbTim10 vs. ScTim10          | 38.3           | 22.6         |
| TbTim10 vs. AtTim10          | 34.9           | 20.2         |
| TbTim10 vs. HsTim10          | 41.8           | 25.5         |
| <b>AtTim10 vs. HsTim10</b>   | <b>47.5</b>    | <b>29.3</b>  |
| <b>ScTim10 vs. HsTim10</b>   | <b>52.9</b>    | <b>32.7</b>  |
| TbTim8/13 vs. ScTim8         | 32.4           | 14.7         |
| TbTim8/13 vs. AtTim8         | 37.9           | 19.5         |
| TbTim8/13 vs. HsTim8         | 33.9           | 18.3         |
| <b>AtTim8 vs. HsTim8</b>     | <b>44.9</b>    | <b>25.5</b>  |
| <b>ScTim8 vs. HsTim8</b>     | <b>50.5</b>    | <b>33.3</b>  |
| TbTim8/13 vs. ScTim13        | 27.4           | 14.5         |
| TbTim8/13 vs. AtTim13        | 30.0           | 14.5         |
| TbTim8/13 vs. HsTim13        | 23.5           | 8.7          |
| <b>AtTim13 vs. HsTim13</b>   | <b>58.3</b>    | <b>40.6</b>  |
| <b>ScTim13 vs. HsTim13</b>   | <b>52.7</b>    | <b>33.6</b>  |

**TbTim** = *Trypanosoma brucei* small Tim

**ScTim** = *Saccharomyces cerevisiae* (budding yeast) small Tim

**AtTim** = *Arabidopsis thaliana* (thale rockcress plant) small Tim

**HsTim** = *Homo sapiens* (human) small Tim
