# Supplementary material for: Divergent Small Tim Homologues Are Associated with TbTim17 and Critical for the Biogenesis of TbTim17 Protein Complexes in Trypanosoma brucei
Source: PubMed Central journal article supplement (PMC6010621; doi:10.1128/msphere.00204-18), 2018-06-20
Supplement: sph003182572st2.pdf [file sph003182572st2.pdf]

| Gene ID <sup>1</sup> | Protein <sup>1</sup> | Coverage (%) | Spectral Intensity |             |
|----------------------|----------------------|--------------|--------------------|-------------|
|                      |                      |              | Wildtype           | TbTim10-Myc |
| Tb927.7.2200         | TbTim9               | 81           | 0                  | 5.86E+06    |
| Tb927.3.1600         | TbTim10              | 58           | 0                  | 1.28E+07    |
| Tb927.11.5390        | TbTim8/13            | 28           | 0                  | 1.20E+06    |
| Tb927.5.3340         | TbTim11              | 46           | 0                  | 2.24E+06    |
| Tb927.4.3430         | TbTim12              | 53           | 0                  | 3.04E+06    |
| Tb927.10.11520       | TbTim13              | 70           | 0                  | 9.76E+06    |
| Tb927.11.13290       | TbTim17              | 27           | 0                  | 2.50E+06    |
| Tb927.9.11220        | TbTim42              | 53           | 0                  | 1.89E+07    |
| Tb927.8.1740         | TbTim62              | 59           | 0                  | 2.18E+07    |
| Tb927.8.1420         | TbACAD               | 44           | 0                  | 6.58E+06    |
| Tb927.6.3740         | TbHsp70              | 45           | 4.76E+05           | 4.93E+06    |
| Tb927.2.2510         | TbVDAC               | 16           | 0                  | 2.99E+05    |
| Tb927.9.9660         | ATOM40               | 5            | 0                  | 1.23E+04    |
| Tb927.6.4280         | TbGAPDH              | 37           | 3.63E+05           | 2.24E+06    |
| Tb927.3.1380         | TbATPase $\beta$     | 22           | 1.72E+05           | 2.32E+06    |
| Tb927.10.14830       | TbAAC                | 35           | 0                  | 4.40E+06    |
| Tb927.10.12840       | TbMCP12              | 29           | 0                  | 1.02E+06    |

<sup>1</sup>GeneID as annotated on [www.tritrypdb.org](http://www.tritrypdb.org).
