# Supplementary material for: Divergent Small Tim Homologues Are Associated with TbTim17 and Critical for the Biogenesis of TbTim17 Protein Complexes in Trypanosoma brucei
Source: PubMed Central journal article supplement (PMC6010621; doi:10.1128/msphere.00204-18), 2018-06-20
Supplement: sph003182572st4.pdf [file sph003182572st4.pdf]

| Primer Name       | Direction | DNA Sequence* (5' → 3')               |
|-------------------|-----------|---------------------------------------|
| TbTim9-Myc        | Forward   | GATCAAGCTT <b>AT</b> GCGCCTGGCTGTAAAG |
| TbTim9-Myc        | Reverse   | GATCTCTAGACA <u>ACTT</u> CAACATTTG    |
| TbTim10-Myc       | Forward   | GATCAAGCTT <b>AT</b> GCGCCTGGCTGTAAAG |
| TbTim10-Myc       | Reverse   | GATCTCTAGATT <u>CGTT</u> CTCCGACAAAAC |
| TbTim8/13-Myc     | Forward   | GATCAAGCTT <b>AT</b> GAATCAGTCTAGTTC  |
| TbTim8/13-Myc     | Reverse   | GATCTCTAGACTTTCCTTTGCTTCC             |
| TbTim9 RNAi       | Forward   | GATCGGATCCCGCCTGGCTGTAAAG             |
| TbTim9 RNAi       | Reverse   | GATCAAGCTTCAACTTCAACATTTG             |
| TbTim10 RNAi      | Forward   | GATCGGATCCCGCCTGGCTGTAAAG             |
| TbTim10 RNAi      | Reverse   | GATCAAGCTTTTCGTTCTCCGACAAAAC          |
| TbTim8/13 RNAi    | Forward   | GATCGGATCCGAATCAGTCTAGTTC             |
| TbTim8/13 RNAi    | Reverse   | GATCAAGCTTCTTTCTTTGCTTCC              |
| TbTim9 qRT-PCR    | Forward   | CCTAAGAACCGTCACCCTTCAAC               |
| TbTim9 qRT-PCR    | Reverse   | TTTACCGCACAAACGCTCCAC                 |
| TbTim10 qRT-PCR   | Forward   | CCATTTGTTGCCCGAGAGTG                  |
| TbTim10 qRT-PCR   | Reverse   | AAGACACGCCTTTTCACCAGG                 |
| TbTim8/13 qRT-PCR | Forward   | GAGTGGTGCCTGTATTCATG                  |
| TbTim8/13 qRT-PCR | Reverse   | CAGTTCCTCATGCAACGGTGC                 |
| TbTim17 qRT-PCR   | Forward   | TGAAGGACAGCACCATTACCCC                |
| TbTim17 qRT-PCR   | Reverse   | CCGAAAAGGAAACCAAAGTAGGC               |
| Tubulin qRT-PCR   | Forward   | TTCCGCACCCTGAAACTGA                   |
| Tubulin qRT-PCR   | Reverse   | TGACGCCGGACACAACAG                    |

\* Restriction enzyme sites are underlined. Start codons are **bolded**.
